# Supplementary material for: Antitumor Effects of Esculetin, a Natural Coumarin Derivative, against Canine Mammary Gland Tumor Cells by Inducing Cell Cycle Arrest and Apoptosis
Source: MDPI journal article supplement (doi:10.3390/vetsci10020084), 2023-01-22
Supplement: s1 [file s1]

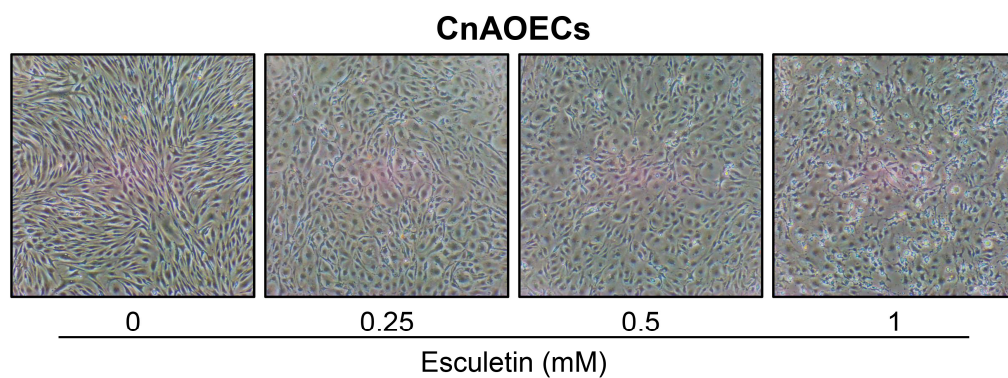

**Figure S1. The effect of esculetin on cell viability in canine aortic endothelial cells.** Canine aortic endothelial cells (CnAOECs) were treated with 0, 0.25, 0.5, and 1 mM of esculetin for 24 h. Following treatment, the cell images were photographed using a microscope (Nikon Eclipse TS100; Nikon Corporation, Tokyo, Japan).

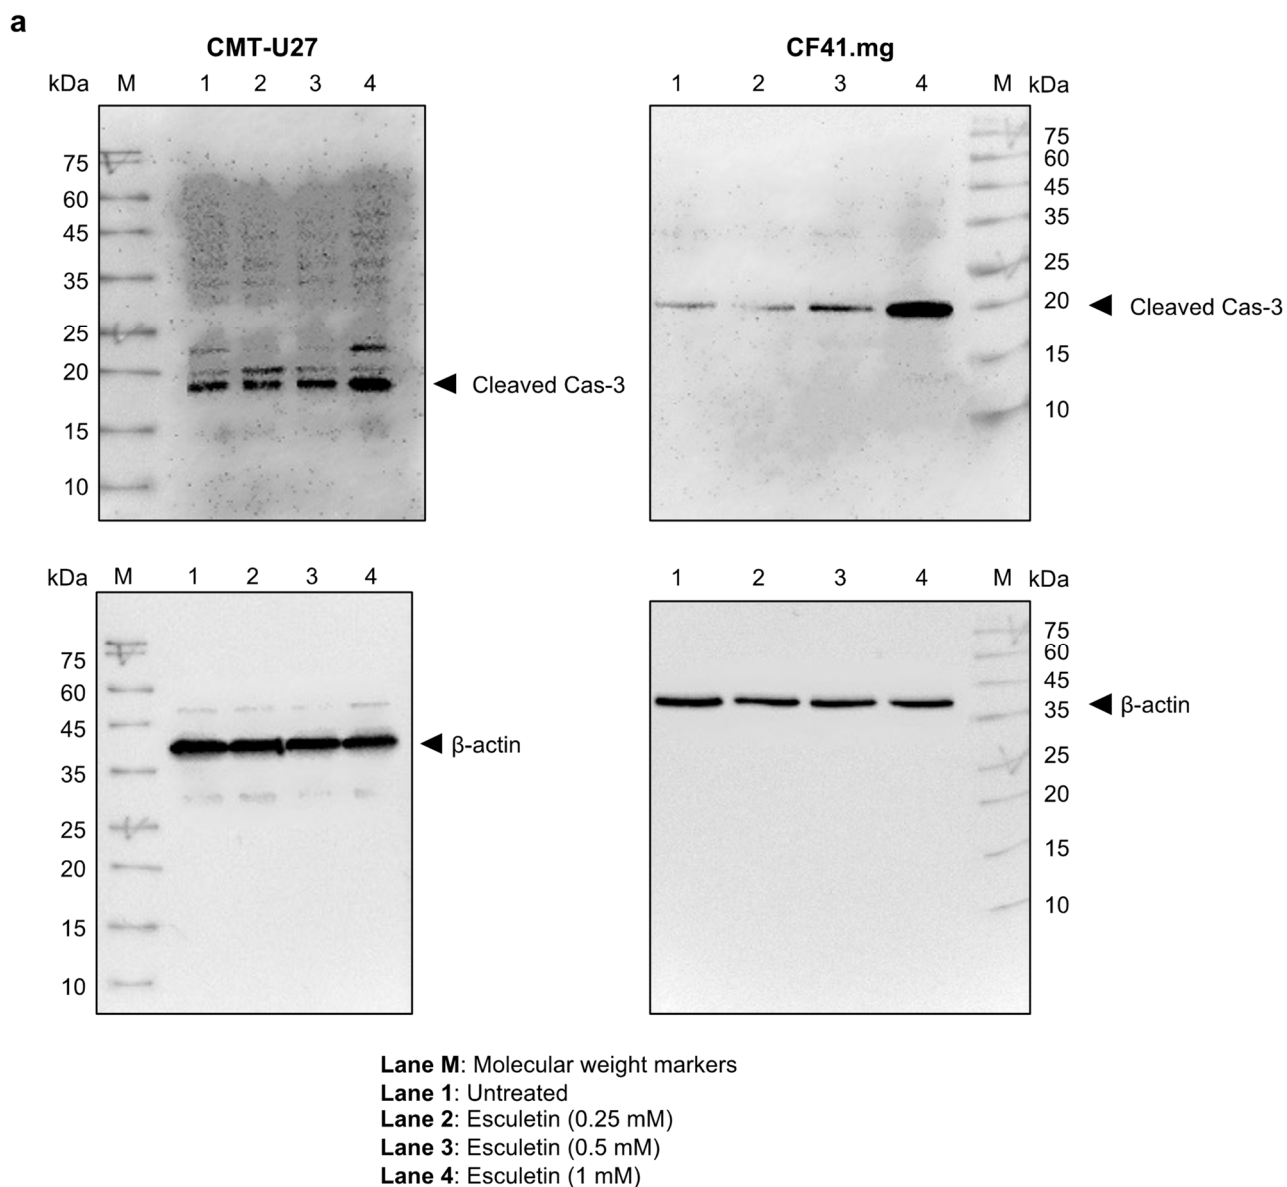

**b**

| CMT-U27        |                               |
|----------------|-------------------------------|
| Esculetin (mM) | Cleaved Cas-3/ $\beta$ -actin |
| 0              | 1.00 $\pm$ 0.04               |
| 0.25           | 1.23 $\pm$ 0.06               |
| 0.5            | 1.31 $\pm$ 0.02               |
| 1              | 1.68 $\pm$ 0.13               |

| CF41.mg        |                               |
|----------------|-------------------------------|
| Esculetin (mM) | Cleaved Cas-3/ $\beta$ -actin |
| 0              | 1.00 $\pm$ 0.18               |
| 0.25           | 1.34 $\pm$ 0.24               |
| 0.5            | 1.68 $\pm$ 0.21               |
| 1              | 5.00 $\pm$ 0.72               |

**Figure S2. Immunoblots and densitometry reading/intensity ratio of apoptotic marker in CMT cells.** CMT-U27 and CF41.mg cells were treated with 0, 0.25, 0.5, and 1 mM of esculetin for 24 h or 48 h. The protein expression of cleaved cas-3 (17/19 kDa) was analyzed by (a) western blots and (b) densitometry reading/intensity ratio. The band intensity was normalized to the corresponding  $\beta$ -actin value. Cas-3, caspase-3.

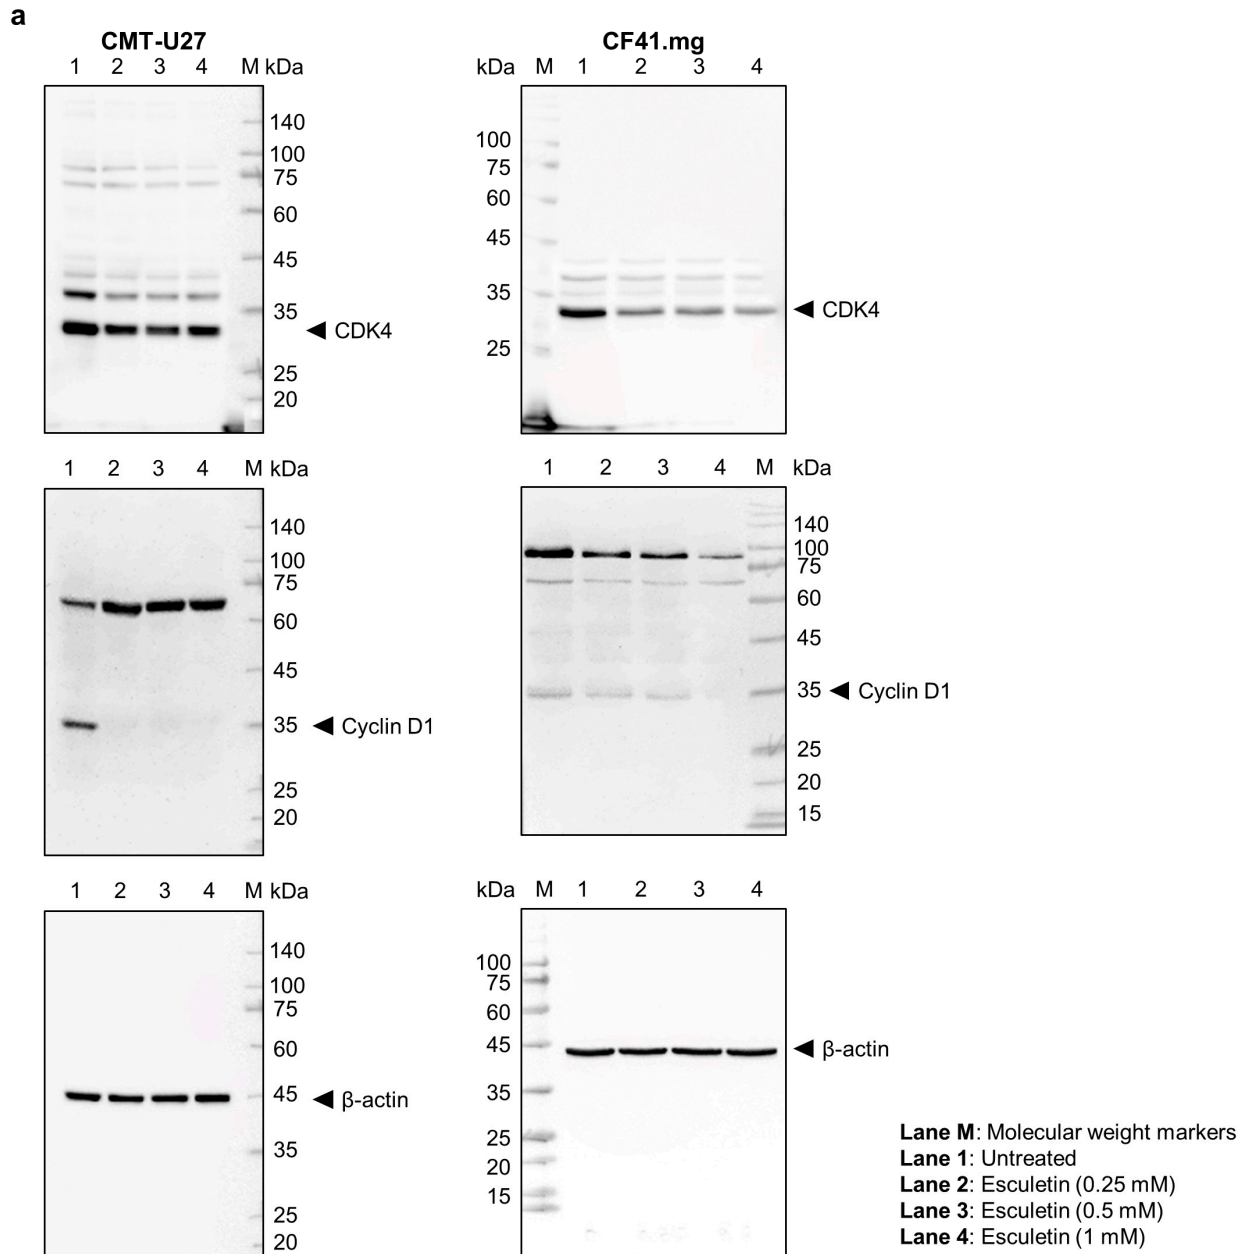

**b**

| CMT-U27        |              |                   | CF41.mg        |              |                   |
|----------------|--------------|-------------------|----------------|--------------|-------------------|
| Esculetin (mM) | CDK4/β-actin | Cyclin D1/β-actin | Esculetin (mM) | CDK4/β-actin | Cyclin D1/β-actin |
| 0              | 1.00 ± 0.05  | 1.00 ± 0.12       | 0              | 1.00 ± 0.07  | 1.00 ± 0.11       |
| 0.25           | 0.52 ± 0.01  | 0.58 ± 0.03       | 0.25           | 0.46 ± 0.02  | 0.81 ± 0.04       |
| 0.5            | 0.39 ± 0.01  | 0.68 ± 0.04       | 0.5            | 0.40 ± 0.02  | 0.75 ± 0.01       |
| 1              | 0.40 ± 0.03  | 0.60 ± 0.04       | 1              | 0.33 ± 0.03  | 0.69 ± 0.06       |

**Figure S3. Immunoblots and densitometry reading/intensity ratio of cell cycle related proteins in CMT cells.** CMT-U27 and CF41.mg cells were treated with 0, 0.25, 0.5, and 1 mM of esculetin for 24 h or 48 h. The protein expression of CDK4 (34 kDa) and cyclin D1 (35 kDa) was analyzed by (a) western blots and (b) densitometry reading/intensity ratio. The band intensity was normalized to the corresponding β-actin value.
